# Supplementary material for: A self-sorted gel network formed by heating a mixture of soy and cod proteins
Source: Royal Society of Chemistry journal article supplement (doi:10.1039/c9fo00560a), 2019-01-01
Supplement: c9fo00560a1.pdf [file c9fo00560a1.pdf]

**Figure S1**

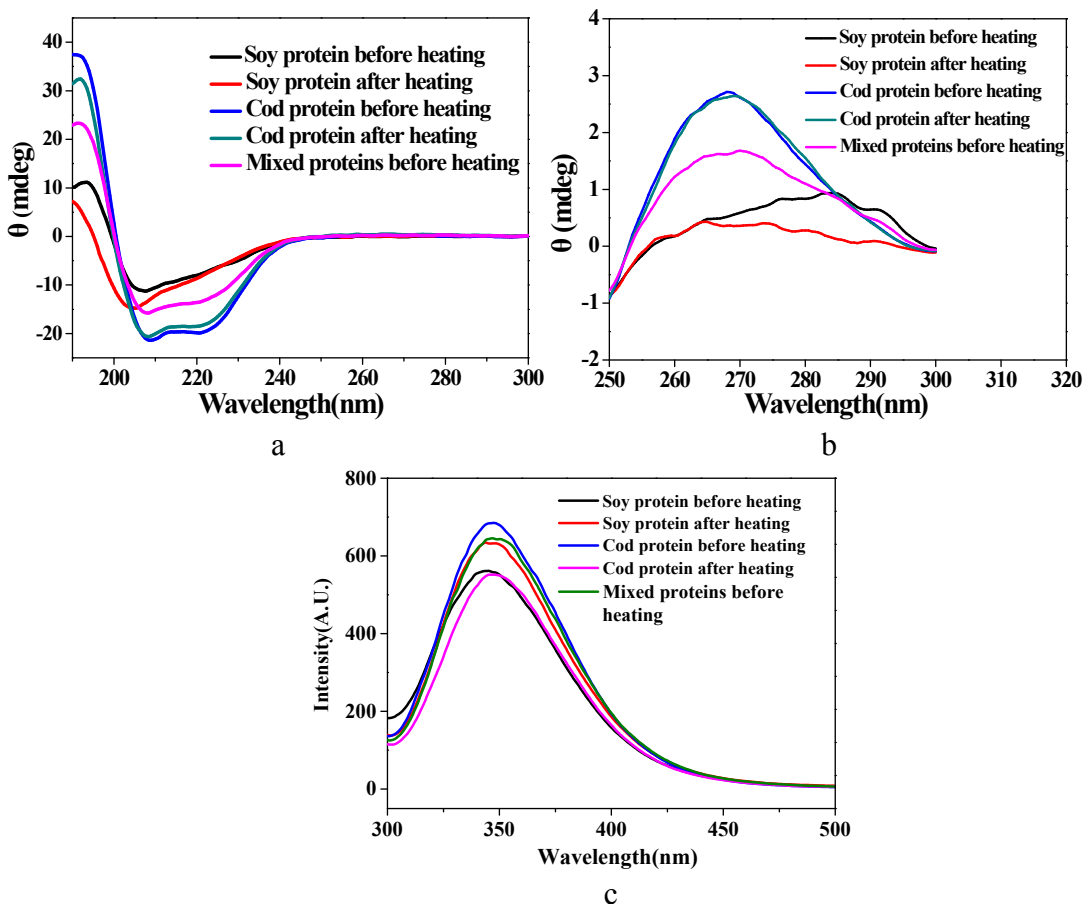

**Figure S1.** Spectroscopic characterization of soy protein and cod protein before and after heating, and the mixed proteins (1:1) before heating: a, far-UV CD, b, near-UV CD, c, fluorescence spectra.

**Figure S2**

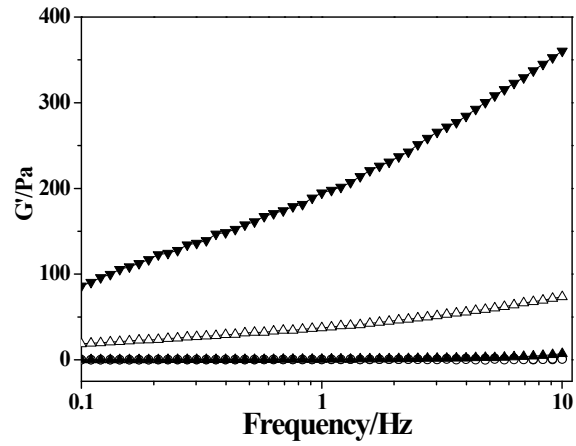

**Figure S2.** Frequency dependence of the storage modulus ( $G'$ ) of mixed protein suspensions (10%, w/v) with different SP:CP ratios: 5:0 (●), 3:1 (○), 1:1 (▲), 1:3 (△), and 0:5 (▼).
